# Supplementary material for: Tannic acid, an IL-1β-direct binding compound, ameliorates IL-1β-induced inflammation and cartilage degradation by hindering IL-1β-IL-1R1 interaction
Source: PubMed Central journal article supplement (PMC10118179; doi:10.1371/journal.pone.0281834), 2023-04-20
Supplement: pone.0281834.s002.pdf [file pone.0281834.s002.pdf]

Figure 3B Effects of TA on the expression of ADAMTSSs, COL2A1 and ACAN in IL-1 - stimulated human OA chondrocytes

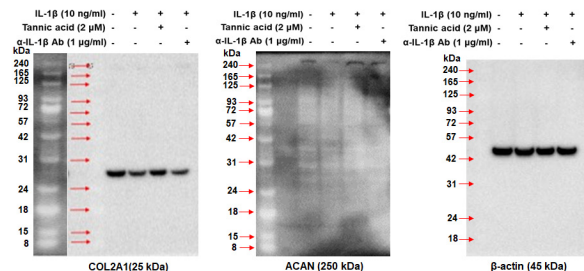

Figure 3B Effects of TA on the expression of MMP3 and MMP-13 in IL-1 - stimulated human OA chondrocytes

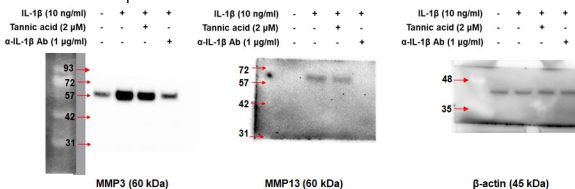

Figure 4A Effects of TA on IL-1 - induced MAPK activation in human OA chondrocytes

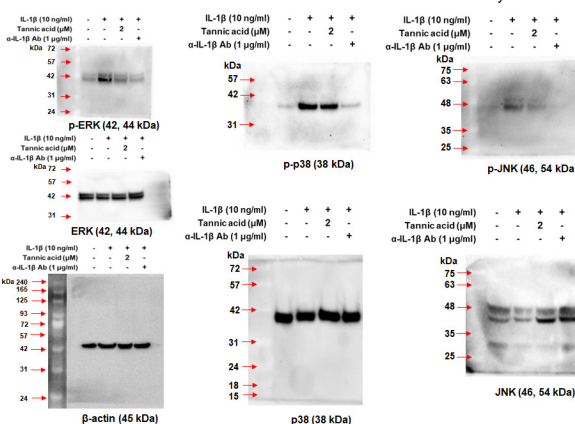

Figure 4B Effects of TA on IL-1 - induced NF- B activation in human OA chondrocytes

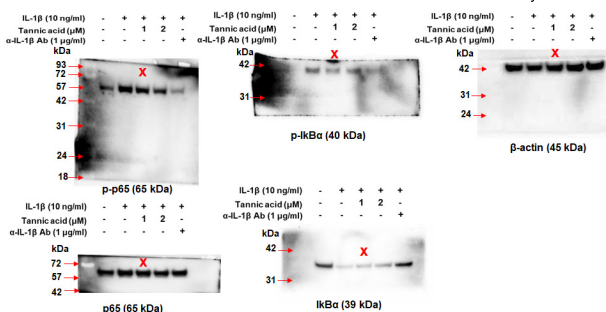

Any lane with X symbol is not represented in the figure submitted with the manuscript
